# Supplementary material for: Microfluidic capacitive sensors with ionic liquid electrodes and CNT/PDMS nanocomposites for simultaneous sensing of pressure and temperature
Source: Royal Society of Chemistry journal article supplement (doi:10.1039/c6tc03994d), 2017-01-01
Supplement: c6tc03994d1.pdf [file c6tc03994d1.pdf]

## Supplementary Information

### Microfluidic capacitive sensors with ionic liquid electrodes and CNT/PDMS nanocomposites for simultaneous sensing of pressure and temperature

Sun Geun Yoon and Suk Tai Chang\*

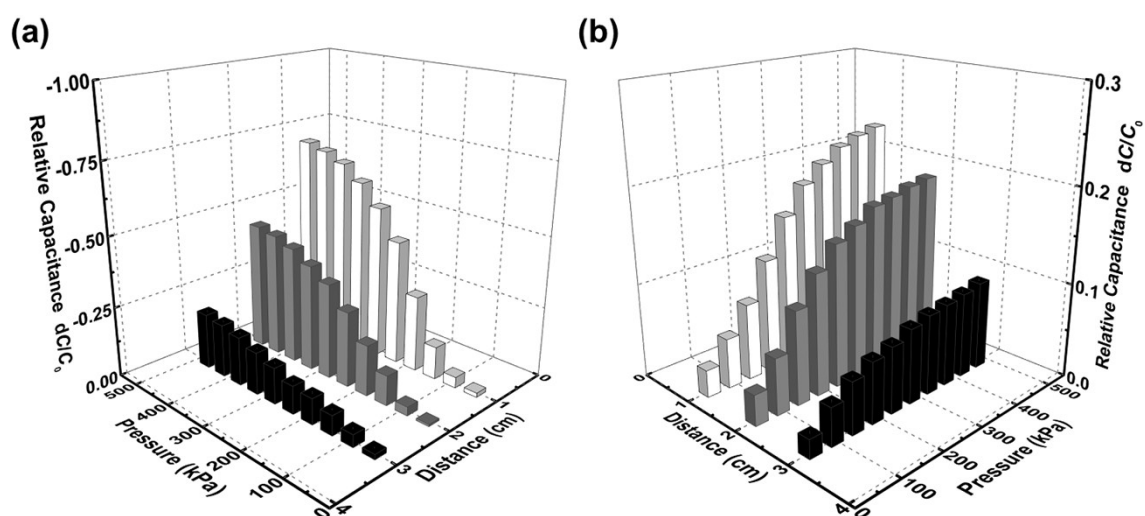

**Figure S1.** Relative capacitance changes as a function of applied pressure at different positions from the electrodes for the microfluidic capacitive sensors with (a) 2 and (b) 4 wt% CNTs.

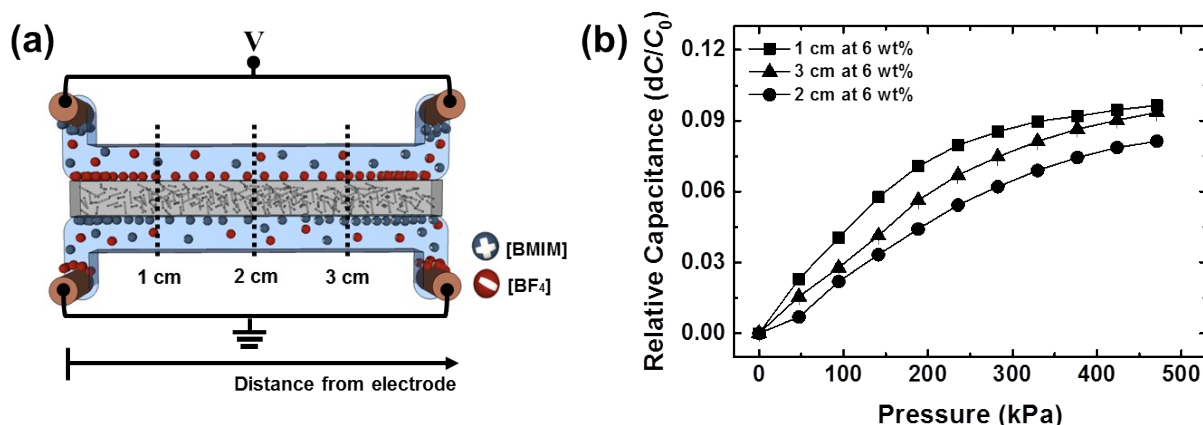

**Figure S2.** (a) Schematic illustration of the ion distribution in the microfluidic capacitive sensors with connecting the copper wire electrodes on both sides of the microchannels. (b) Relative capacitance changes as a function of applied pressure at different distances from the electrodes for the microfluidic capacitive sensor with a CNT concentration of 6 wt%.

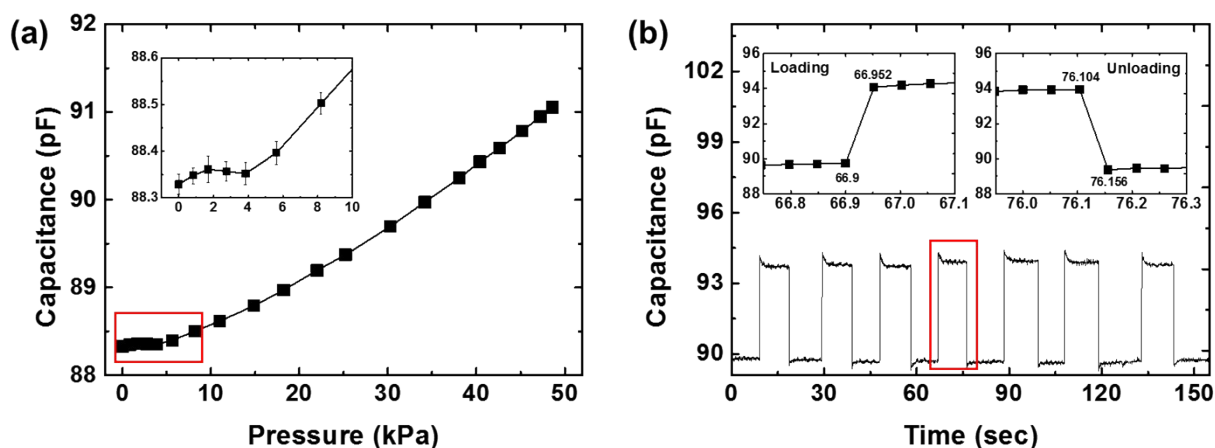

**Figure S3.** (a) Capacitance profiles of microfluidic capacitive sensors with 6 wt% CNTs as a function of applied pressure at a range of 0–50 kPa. (b) Capacitance changes of microfluidic capacitive sensors with 6 wt% CNTs as a function of time with cyclic loads/unloads of the vertical pressure of 60 kPa. The insets in Figure S3b show the response time of microfluidic capacitive sensors at both loading and unloading cycles. The pressure applying position of both tests was 1 cm from the wire electrodes.

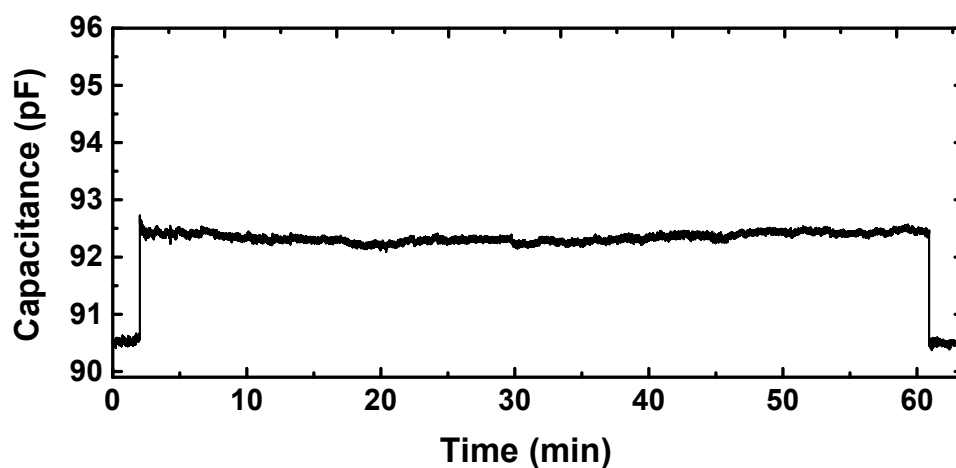

**Figure S4.** Capacitance change of the microfluidic capacitive sensor as a function of time. A constant force of 1N was applied for 60 min at a position of 1cm from the wire electrode. The sensor was fabricated with 6 wt% CNTs and the capacitance was measured under the constant AC voltage (1 V, 1 kHz).

(a)

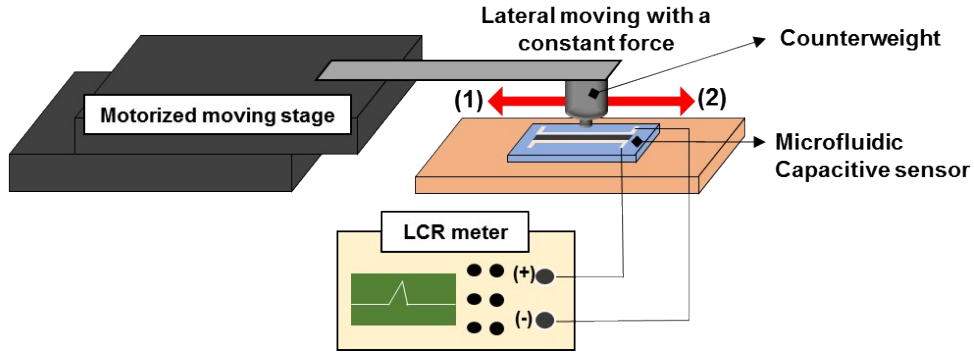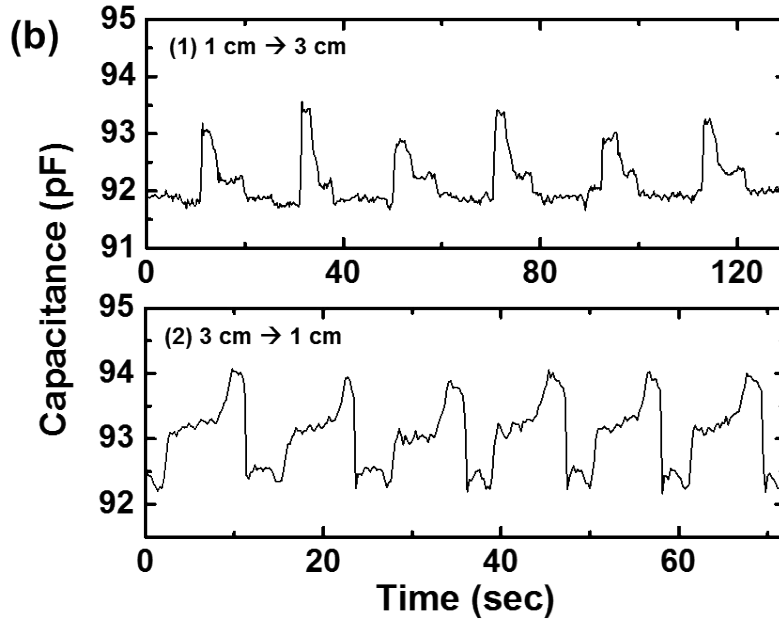

**Figure S5.** (a) Schematic illustration of the lateral movement of constant force along the sensing element of our microfluidic capacitive sensor with a motorized moving stage. Laterally movable motorized stage was connected with a counterweight (50 g) and the counterweight was able to move backward or forward directions with applying a constant force of 0.5 N onto the microfluidic capacitive sensor. A moving speed of the counterweight was 2.941 mm/s. (b) Capacitance changes of the microfluidic capacitive sensors subjected to repetitive motions of the counterweight at different sliding modes. The experiments were performed with the microfluidic capacitive sensor with 6 wt% CNTs.

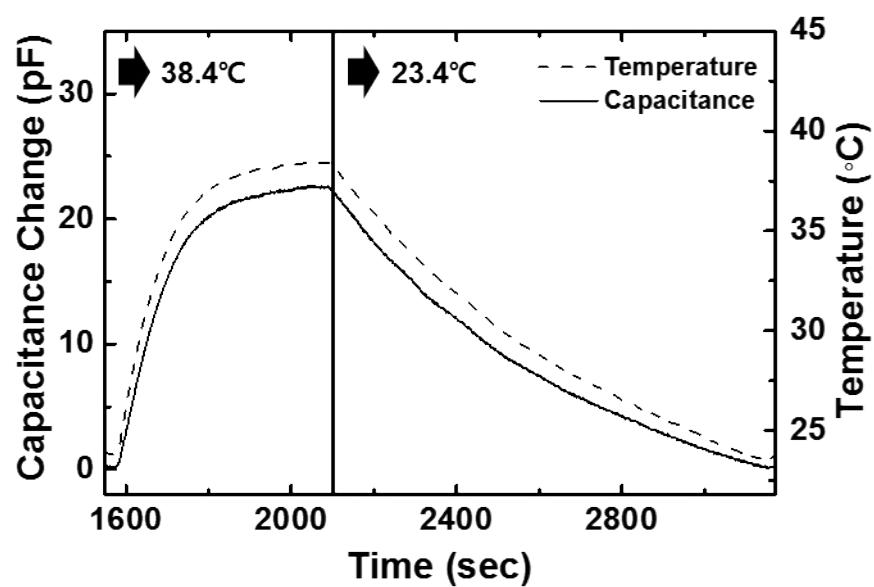

**Figure S6.** Magnification of the 2nd peak in Figure 5c. The graph shows the capacitance changes in response to the temperature changes (23.4–38.4°C)

**Table S1.** Comparison of the performance of liquid-typed pressure sensors including microfluidic capacitive sensors used in this study

| Reference                | Types of transduction | Active Materials                   | Response time | Minimum detection | Maximum detection | Sensitivity                                                |
|--------------------------|-----------------------|------------------------------------|---------------|-------------------|-------------------|------------------------------------------------------------|
| Sun et al. [Ref. 27]     | Capacitive type       | Hydrogel / NaCl                    | -             | -                 | 40 kPa            | 0.011 kPa <sup>-1</sup>                                    |
| Roberts et al. [Ref. 28] | Capacitive type       | EGaIn                              | -             | 2.5 kPa           | 25 kPa            | 0.052 kPa <sup>-1</sup>                                    |
| Hotta et al. [Ref. 38]   | Capacitive type       | DI water                           | -             | 12.5 kPa          | 300 kPa           | 4.5 × 10 <sup>-5</sup> pF kPa <sup>-1</sup>                |
| Li et al. [Ref. 39]      | Resistive type        | Ethylene glycol                    | < 2.5 ms      | ~70 Pa            | 1800 kPa          | 8.4 × 10 <sup>-5</sup> – 0.45 kPa <sup>-1</sup>            |
| Liao et al. [Ref. 40]    | Capacitive type       | Polyalcohol, water and silicon oil | -             | 0.05 N            | 1.05 N            | 3.51 pF N <sup>-1</sup>                                    |
| This work                | Capacitive type       | CPCs / Ionic liquid                | <52 ms        | 4 kPa             | 500 kPa           | -4.02 × 10 <sup>-3</sup> kPa <sup>-1</sup><br>(1 wt% CNTs) |
|                          |                       |                                    |               |                   |                   | 1.10 × 10 <sup>-3</sup> kPa <sup>-1</sup><br>(6 wt% CNTs)  |

Our microfluidic sensor systems have advantages such as the detection capability of lateral pressure movement, bimodal signal, and high sensitivity to temperature changes. Although our sensor systems showed the comparable pressure sensitivity to other liquid-type pressure sensors at high pressure range (100 – 300 kPa) as shown in Table S1, the pressure sensitivity of our sensors at low pressure range need to be improved. In addition, leakage of ionic liquids and wire electrode connection could be additional problems of our microfluidic sensor for its practical usage. However, such problems of our current microfluidic capacitive sensor systems can be solved by using ion-gel based capacitive sensor systems. The results of the ion-gel based capacitive sensors will be published in near future elsewhere.

**Table S2.** Comparison of the performance of several studies in temperature sensing devices including microfluidic capacitive sensors used in this study

| References                | Types of transduction         | Active materials                 | Minimum detection | Sensitivity                                           |
|---------------------------|-------------------------------|----------------------------------|-------------------|-------------------------------------------------------|
| Kim et al.<br>[Ref. 11]   | Resistive type                | CNT microyarns                   | -                 | 0.24% °C <sup>-1</sup>                                |
| Honda et al.<br>[Ref. 14] | Resistive type                | CNT / PEDOT:PSS composite        | -                 | 0.61% °C <sup>-1</sup>                                |
| Trung et al.<br>[Ref. 15] | Transistor type               | R-GO / PU nanocomposite          | 0.2 °C            | 1.34% °C <sup>-1</sup>                                |
| Yeo et al.<br>[Ref. 16]   | Resistive Type                | Ti / Pt strip                    | -                 | 1.43 Ω °C <sup>-1</sup>                               |
| Ota et al.<br>[Ref. 30]   | Resistive and Capacitive type | EGaIn and Ionic liquid           | 0.64 °C           | 3.9% °C <sup>-1</sup>                                 |
| This work                 | Capacitive type               | CPCs / Ionic liquid (6 wt% CNTs) | 0.5 °C            | 3.46% °C <sup>-1</sup><br>(1.78 pF °C <sup>-1</sup> ) |
